# Supplementary material for: Computational search for UV radiation resistance strategies in Deinococcus swuensis isolated from Paramo ecosystems
Source: PLOS journal article supplement (doi:10.1371/journal.pone.0221540), 2019-12-02
Supplement: S4 (10.1371/journal.pone.0221540.s004) [file journal.pone.0221540.s004]

Table 1: Cochrans C test for variance of groups: C:ratio of the largest variance to the sum of the variances, n:number of observations (genes) in each group, k:number of groups.

| <b>Sample</b>   | <b>Controls</b> |           |           | <b>Irradiated</b> |            |            |
|-----------------|-----------------|-----------|-----------|-------------------|------------|------------|
|                 | <b>C1</b>       | <b>C2</b> | <b>C3</b> | <b>IR1</b>        | <b>IR2</b> | <b>IR3</b> |
| <b>Variance</b> | 0.6701          | 0.9226    | 0.6896    | 0.6284            | 0.6849     | 0.6022     |

C = 0.21122, n = 3223, k = 6, p-value <2.2e-16
